# Supplementary material
Source: Springer Nature journal article supplement (https://www.springermedizin.de/resource/supplementary/13002_2008_136_MOESM1_ESM.pdf/9627318)
Supplement: MOESM1 [file 9627318]

**Additional file 1. Ethnobotanical investigation on Monte Ortobene (Sardinia, Italy). List of species of ethnobotanical interest**

| Species                                                               | Botanical family | Folk names                 | FC | Used parts                      | Categories of use                                        | Number of categories of use | Number of different uses (secondary categories) | Number of citations | Wild/cultivated w: wild c: cultivated w/c: both | Local frequency r: rare mc: moderately common vc: very common | RFC  | CI   | H'   | J    |
|-----------------------------------------------------------------------|------------------|----------------------------|----|---------------------------------|----------------------------------------------------------|-----------------------------|-------------------------------------------------|---------------------|-------------------------------------------------|---------------------------------------------------------------|------|------|------|------|
| <i>Achillea ligustica</i> All.                                        | Compositae       | Arculentu                  | 2  | Inflorescences                  | Medicinal                                                | 1                           | 2                                               | 3                   | w                                               | vc                                                            | 0,12 | 0,18 | 0,28 | 0,92 |
| <i>Allium ampeloprasum</i> L.                                         | Liliaceae        | Azu                        | 1  | Bulbs                           | Alimentary                                               | 1                           | 1                                               | 1                   | w                                               | r                                                             | 0,06 | 0,06 | 0,00 | 0,00 |
| <i>Allium subhirsutum</i> L.                                          | Liliaceae        | Azu                        | 1  | Herbaceous stems                | Alimentary                                               | 1                           | 1                                               | 1                   | w                                               | mc                                                            | 0,06 | 0,06 | 0,00 | 0,00 |
| <i>Allium triquetrum</i> L.                                           | Liliaceae        | Apara                      | 3  | Herbaceous stems                | Alimentary                                               | 1                           | 1                                               | 3                   | w                                               | mc                                                            | 0,18 | 0,18 | 0,00 | 0,00 |
| <i>Arbutus unedo</i> L.                                               | Ericaceae        | Lidone                     | 4  | Fruits, wood                    | Alimentary, Domestic, Ludic, Medicinal                   | 4                           | 5                                               | 7                   | w                                               | r                                                             | 0,24 | 0,41 | 0,64 | 0,92 |
| <i>Artemisia arborescens</i> L.                                       | Compositae       | Assentu                    | 2  | Flowers, epigeal part           | Magic/ medicinal, Medicinal                              | 2                           | 2                                               | 2                   | w                                               | vc                                                            | 0,12 | 0,12 | 0,30 | 1,00 |
| <i>Arundo donax</i> L.                                                | Graminaceae      | Canna                      | 1  | Stems                           | Agropastoral, Ludic                                      | 2                           | 2                                               | 2                   | w                                               | vc                                                            | 0,06 | 0,12 | 0,30 | 1,00 |
| <i>Asparagus acutifolius</i> L.                                       | Liliaceae        | Isparagu, ispina sorichina | 12 | Shoots or sprouts, epigeal part | Agropastoral, Alimentary, Domestic, Medicinal, Religious | 5                           | 6                                               | 27                  | w                                               | mc                                                            | 0,71 | 1,59 | 0,60 | 0,78 |
| <i>Asparagus albus</i> L.                                             | Liliaceae        | Isparagu                   | 1  | Shoots or sprouts               | Alimentary                                               | 1                           | 1                                               | 1                   | w                                               | r                                                             | 0,06 | 0,06 | 0,00 | 0,00 |
| <i>Asphodelus microcarpus</i> Salzm. et Viv.                          | Liliaceae        | Irbuttu                    | 2  | Leaves, roots                   | Ludic, Medicinal                                         | 2                           | 2                                               | 2                   | w                                               | vc                                                            | 0,12 | 0,12 | 0,30 | 1,00 |
| <i>Ballota nigra</i> L. subsp. <i>uncinata</i> (Fiori et Bèg.) Patzak | Labiatae         | Marrubiu nigheddu          | 1  | Leaves                          | Medicinal                                                | 1                           | 1                                               | 1                   | w                                               | mc                                                            | 0,06 | 0,06 | 0,00 | 0,00 |

| Species                                             | Botanical family | Folk names         | FC | Used parts                                | Categories of use     | Number of categories of use | Number of different uses (secondary categories) | Number of citations | Wild/cultivated w: wild c: cultivated w/c: both | Local frequency r: rare mc: moderately common vc: very common | RFC  | CI   | H'   | J    |
|-----------------------------------------------------|------------------|--------------------|----|-------------------------------------------|-----------------------|-----------------------------|-------------------------------------------------|---------------------|-------------------------------------------------|---------------------------------------------------------------|------|------|------|------|
| <i>Bellis perennis</i> L.                           | Compositae       | Margheriteda       | 1  | Inflorescences                            | Ludic                 | 1                           | 1                                               | 1                   | w                                               | vc                                                            | 0,06 | 0,06 | 0,00 | 0,00 |
| <i>Bellis sylvestris</i> Cyr.                       | Compositae       | Margheriteda       | 1  | Inflorescences                            | Ludic                 | 1                           | 1                                               | 1                   | w                                               | vc                                                            | 0,06 | 0,06 | 0,00 | 0,00 |
| <i>Beta vulgaris</i> L.                             | Chenopodiaceae   | Beda               | 9  | Leaves                                    | Alimentary, Medicinal | 2                           | 3                                               | 16                  | w                                               | vc                                                            | 0,53 | 0,94 | 0,38 | 0,79 |
| <i>Borago officinalis</i> L.                        | Boraginaceae     | Suzzamele          | 1  | Leaves from basal rosette, flowers        | Alimentary            | 1                           | 2                                               | 2                   | w                                               | vc                                                            | 0,06 | 0,12 | 0,30 | 1,00 |
| <i>Briza maxima</i> L.                              | Graminaceae      | Sonaiobs           | 1  | Inflorescences                            | Ludic                 | 1                           | 1                                               | 1                   | w                                               | vc                                                            | 0,06 | 0,06 | 0,00 | 0,00 |
| <i>Calendula arvensis</i> L. subsp. <i>arvensis</i> | Compositae       | Frone de cada mese | 1  | Epigeal part (as a whole), inflorescences | Medicinal             | 1                           | 2                                               | 2                   | w                                               | vc                                                            | 0,06 | 0,12 | 0,30 | 1,00 |
| <i>Calicotome villosa</i> (Poiret) Link             | Leguminosae      | Tiria              | 1  | Branches/twigs                            | Agropastoral          | 1                           | 1                                               | 1                   | w                                               | mc                                                            | 0,06 | 0,06 | 0,00 | 0,00 |
| <i>Capsella bursa-pastoris</i> (L.) Medicus         | Cruciferae       | Isperra carzones   | 1  | Epigeal part (as a whole)                 | Medicinal             | 1                           | 1                                               | 1                   | w                                               | vc                                                            | 0,06 | 0,06 | 0,00 | 0,00 |
| <i>Carduus cephalanthus</i> Viv.                    | Compositae       | Gardu              | 1  | Stems                                     | Alimentary            | 1                           | 1                                               | 1                   | w                                               | vc                                                            | 0,06 | 0,06 | 0,00 | 0,00 |
| <i>Carduus pycnocephalus</i> L.                     | Compositae       | Gardu              | 1  | Stems                                     | Alimentary            | 1                           | 1                                               | 1                   | w                                               | vc                                                            | 0,06 | 0,06 | 0,00 | 0,00 |
| <i>Carthamus lanatus</i> L.                         | Compositae       | Gardu              | 1  | Stems                                     | Alimentary            | 1                           | 1                                               | 1                   | w                                               | vc                                                            | 0,06 | 0,06 | 0,00 | 0,00 |
| <i>Centaurea calcitrapa</i> L.                      | Compositae       | Gardu              | 1  | Inflorescences (bracts)                   | Agropastoral          | 1                           | 1                                               | 1                   | w                                               | mc                                                            | 0,06 | 0,06 | 0,00 | 0,00 |
| <i>Chamaerops humilis</i> L.                        | Palmae           | palma              | 1  | Leaves                                    | Magic / medicinal     | 1                           | 1                                               | 1                   | -                                               |                                                               | 0,06 | 0,06 | 0,00 | 0,00 |
| <i>Chondrilla juncea</i> L.                         | Compositae       | Su porru           | 1  | Herbaceous stems                          | Alimentary            | 1                           | 3                                               | 3                   | w                                               | vc                                                            | 0,06 | 0,18 | 0,48 | 1,00 |

| Species                                                    | Botanical family | Folk names         | FC | Used parts                         | Categories of use               | Number of categories of use | Number of different uses (secondary categories) | Number of citations | Wild/cultivated w: wild c: cultivated w/c: both | Local frequency r: rare mc: moderately common vc: very common | RFC  | CI   | H'   | J    |
|------------------------------------------------------------|------------------|--------------------|----|------------------------------------|---------------------------------|-----------------------------|-------------------------------------------------|---------------------|-------------------------------------------------|---------------------------------------------------------------|------|------|------|------|
| <i>Cichorium intybus</i> L.                                | Compositae       | Zicoria            | 4  | Leaves from basal rosette, roots   | Alimentary, Medicinal           | 2                           | 5                                               | 11                  | w                                               | vc                                                            | 0,24 | 0,65 | 0,64 | 0,91 |
| <i>Cistus albidus</i> L.                                   | Cistaceae        | Mudrecu            | 1  | Branches/twigs                     | Domestic                        | 1                           | 1                                               | 1                   | w                                               | mc                                                            | 0,06 | 0,06 | 0,00 | 0,00 |
| <i>Cistus salvifolius</i> L.                               | Cistaceae        | Mudrecu            | 1  | Branches/twigs                     | Domestic                        | 1                           | 1                                               | 1                   | w                                               | mc                                                            | 0,06 | 0,06 | 0,00 | 0,00 |
| <i>Crataegus monogyna</i> Jacq.                            | Rosaceae         | Calabriche         | 2  | Flowers, fruits                    | Alimentary, Medicinal           | 2                           | 4                                               | 4                   | w                                               | mc                                                            | 0,12 | 0,24 | 0,60 | 1,00 |
| <i>Crepis vesicaria</i> L.                                 | Compositae       | Zicoria burda      | 2  | Leaves from basal rosette, flowers | Alimentary                      | 1                           | 2                                               | 4                   | w                                               | vc                                                            | 0,12 | 0,24 | 0,30 | 1,00 |
| <i>Cydonia oblonga</i> Miller                              | Rosaceae         | Melachidonza       | 3  | Fruits                             | Alimentary, Domestic, Medicinal | 3                           | 3                                               | 4                   | c                                               | mc                                                            | 0,18 | 0,24 | 0,45 | 0,95 |
| <i>Daucus carota</i> L. subsp. <i>carota</i>               | Umbelliferae     | Frustinaca agreste | 3  | Leaves from basal rosette, roots   | Alimentary                      | 1                           | 3                                               | 4                   | w                                               | vc                                                            | 0,18 | 0,24 | 0,45 | 0,95 |
| <i>Daucus carota</i> L. subsp. <i>maximum</i> (Desf.) Ball | Umbelliferae     | Frustinaca agreste | 1  | Leaves from basal rosette          | Alimentary                      | 1                           | 1                                               | 1                   | w                                               | vc                                                            | 0,06 | 0,06 | 0,00 | 0,00 |
| <i>Echium plantagineum</i> L.                              | Boraginaceae     | Suzzamele          | 2  | Flowers                            | Alimentary                      | 1                           | 1                                               | 2                   | w                                               | vc                                                            | 0,12 | 0,12 | 0,00 | 0,00 |
| <i>Eucalyptus globulus</i> Labill                          | Myrtaceae        | Eucaliptu          | 2  | Leaves                             | Medicinal                       | 1                           | 1                                               | 2                   | c                                               | r                                                             | 0,12 | 0,12 | 0,00 | 0,00 |
| <i>Euphorbia helioscopia</i> L.                            | Euphorbiaceae    | Lattoricu          | 1  | Latex                              | Medicinal                       | 1                           | 1                                               | 1                   | w                                               | vc                                                            | 0,06 | 0,06 | 0,00 | 0,00 |
| <i>Ferula communis</i> L.                                  | Umbelliferae     | Ferula             | 4  | Stems                              | Handicraft, Ludic               | 2                           | 2                                               | 5                   | w                                               | mc                                                            | 0,24 | 0,29 | 0,22 | 0,72 |

| Species                                                                   | Botanical family | Folk names                        | FC | Used parts                                  | Categories of use             | Number of categories of use | Number of different uses (secondary categories) | Number of citations | Wild/cultivated w: wild c: cultivated w/c: both | Local frequency r: rare mc: moderately common vc: very common | RFC  | CI   | H'   | J    |
|---------------------------------------------------------------------------|------------------|-----------------------------------|----|---------------------------------------------|-------------------------------|-----------------------------|-------------------------------------------------|---------------------|-------------------------------------------------|---------------------------------------------------------------|------|------|------|------|
| <i>Foeniculum vulgare</i> Miller subsp. <i>piperitum</i> (Ucria) Coutinho | Umbelliferae     | Frinucu                           | 4  | Leaves, stems                               | Alimentary                    | 1                           | 2                                               | 7                   | w                                               | vc                                                            | 0,24 | 0,41 | 0,30 | 0,99 |
| <i>Galactites tomentosa</i> Moench                                        | Compositae       | Gardu mele                        | 2  | Stems                                       | Alimentary                    | 1                           | 1                                               | 2                   | w                                               | vc                                                            | 0,12 | 0,12 | 0,00 | 0,00 |
| <i>Halimium halimifolium</i> (L.) Willk                                   | Cistaceae        | Mudrecu                           | 1  | Branches/twigs                              | Domestic                      | 1                           | 1                                               | 1                   | w                                               | mc                                                            | 0,06 | 0,06 | 0,00 | 0,00 |
| <i>Hedera helix</i> L.                                                    | Araliaceae       | Edera                             | 3  | Leaves                                      | Domestic, Medicinal           | 2                           | 3                                               | 4                   | w                                               | vc                                                            | 0,18 | 0,24 | 0,45 | 0,95 |
| <i>Helichrysum italicum</i> (Roth) Don                                    | Compositae       | Uscradinu, frore de Santu Jubanne | 2  | Epigeal part (as a whole)                   | Agropastoral, Magic/medicinal | 2                           | 2                                               | 2                   | w                                               | vc                                                            | 0,12 | 0,12 | 0,30 | 1,00 |
| <i>Hyoseris radiata</i> L.                                                | Compositae       | Paparanzolu                       | 1  | Herbaceous stems                            | Alimentary                    | 1                           | 1                                               | 1                   | w                                               | r                                                             | 0,06 | 0,06 | 0,00 | 0,00 |
| <i>Hypericum perforatum</i> L.                                            | Guttiferae       | Pericu                            | 2  | Flowering shoots                            | Medicinal                     | 1                           | 2                                               | 3                   | w                                               | mc                                                            | 0,12 | 0,18 | 0,28 | 0,92 |
| <i>Hypochoeris radicata</i> L.                                            | Compositae       | Zicoria burda                     | 2  | Herbaceous stems, leaves from basal rosette | Alimentary                    | 1                           | 2                                               | 2                   | w                                               | mc                                                            | 0,12 | 0,12 | 0,30 | 1,00 |
| <i>Juncus inflexus</i> L.                                                 | Juncaceae        | Zuncu                             | 2  | Leaves                                      | Magic/medicinal               | 1                           | 1                                               | 2                   | w                                               | r                                                             | 0,12 | 0,12 | 0,30 | 0,00 |
| <i>Lagurus ovatus</i> L.                                                  | Graminaceae      | Mussitos                          | 1  | Epigeal part (as a whole)                   | Ludic                         | 1                           | 1                                               | 1                   | w                                               | vc                                                            | 0,06 | 0,06 | 0,00 | 0,00 |
| <i>Laurus nobilis</i> L.                                                  | Lauraceae        | Labru                             | 4  | Leaves                                      | Medicinal                     | 1                           | 3                                               | 5                   | c                                               | mc                                                            | 0,24 | 0,29 | 0,41 | 0,86 |
| <i>Lavandula stoechas</i> L.                                              | Labiatae         | Archimissa                        | 2  | Inflorescences                              | Domestic                      | 1                           | 2                                               | 4                   | w                                               | mc                                                            | 0,12 | 0,24 | 0,30 | 1,00 |
| <i>Lavatera cretica</i> L.                                                | Malvaceae        | Marmaruzza                        | 1  | Leaves                                      | Medicinal                     | 1                           | 6                                               | 6                   | w                                               | vc                                                            | 0,06 | 0,35 | 0,78 | 1,00 |
| <i>Lavatera olbia</i> L.                                                  | Malvaceae        | Marmara                           | 1  | Flowers                                     | Medicinal                     | 1                           | 1                                               | 1                   | w                                               | vc                                                            | 0,06 | 0,06 | 0,00 | 0,00 |

| Species                                                               | Botanical family | Folk names    | FC | Used parts                 | Categories of use                   | Number of categories of use | Number of different uses (secondary categories) | Number of citations | Wild/cultivated w: wild c: cultivated w/c: both | Local frequency r: rare mc: moderately common vc: very common | RFC  | CI   | H'   | J    |
|-----------------------------------------------------------------------|------------------|---------------|----|----------------------------|-------------------------------------|-----------------------------|-------------------------------------------------|---------------------|-------------------------------------------------|---------------------------------------------------------------|------|------|------|------|
| <i>Malva parviflora</i> L.                                            | Malvaceae        | Su panicheddu | 1  | Fruits                     | Alimentary                          | 1                           | 1                                               | 1                   | w                                               | vc                                                            | 0,06 | 0,06 | 0,00 | 0,00 |
| <i>Malva sylvestris</i> L.                                            | Malvaceae        | Marmaruzza    | 7  | Leaves, roots              | Domestic, Ludic, Medicinal          | 3                           | 9                                               | 19                  | w                                               | vc                                                            | 0,41 | 1,12 | 0,81 | 0,85 |
| <i>Marrubium vulgare</i> L.                                           | Labiatae         | Marrubiu      | 1  | Leaves                     | Medicinal                           | 1                           | 1                                               | 1                   | w                                               | mc                                                            | 0,06 | 0,06 | 0,00 | 0,00 |
| <i>Matricaria chamomilla</i> L.                                       | Compositae       | Camomilla     | 3  | Inflorescences             | Medicinal                           | 1                           | 5                                               | 6                   | w                                               | r                                                             | 0,18 | 0,35 | 0,68 | 0,97 |
| <i>Medicago arabica</i> (L.) Hudson                                   | Leguminosae      | Trivozu       | 1  | Leaves                     | Medicinal                           | 1                           | 2                                               | 2                   | w                                               | vc                                                            | 0,06 | 0,12 | 0,30 | 1,00 |
| <i>Mentha suaveolens</i> Ehrh. subsp. <i>insularis</i> (Req.) Greuter | Labiatae         | Mentastru     | 4  | Leaves, live plants        | Alimentary, Domestic                | 2                           | 2                                               | 4                   | w                                               | mc                                                            | 0,24 | 0,24 | 0,24 | 0,81 |
| <i>Myrtus communis</i> L.                                             | Myrtaceae        | Murta         | 2  | Leaves, fruits             | Alimentary                          | 1                           | 2                                               | 3                   | w/c                                             | mc                                                            | 0,12 | 0,18 | 0,28 | 0,92 |
| <i>Nerium oleander</i> L.                                             | Apocynaceae      | Neulache      | 1  | Leaves                     | Medicinal                           | 1                           | 1                                               | 1                   | w/c                                             | mc                                                            | 0,06 | 0,06 | 0,00 | 0,00 |
| <i>Olea europea</i> L. var. <i>sylvestris</i> Brot.                   | Oleaceae         | Ozzastru      | 1  | Wood, young twigs          | Handicraft, Domestic, Ludic         | 3                           | 3                                               | 3                   | w                                               | mc                                                            | 0,06 | 0,18 | 0,48 | 1,00 |
| <i>Olea europea</i> L. var. <i>europaea</i>                           | Oleaceae         | Oliba         | 5  | Leaves, oil, seeds         | Magic/medicinal, Medicinal          | 2                           | 3                                               | 6                   | c                                               | mc                                                            | 0,29 | 0,35 | 0,44 | 0,92 |
| <i>Opuntia ficus-indica</i> (L.) Miller                               | Cactaceae        | Ficu murisca  | 7  | Fruits, lymph, live plants | Agropastoral, Alimentary, Medicinal | 3                           | 4                                               | 9                   | w                                               | vc                                                            | 0,41 | 0,53 | 0,57 | 0,95 |
| <i>Papaver rhoeas</i> L.                                              | Papaveraceae     | Attanda       | 2  | Flowers, seeds             | Ludic, Medicinal                    | 2                           | 2                                               | 2                   | w                                               | vc                                                            | 0,12 | 0,12 | 0,30 | 1,00 |
| <i>Parietaria diffusa</i> M. et K.                                    | Urticaceae       | Erba e bentu  | 4  | Epigeal part (as a whole)  | Alimentary, Medicinal               | 2                           | 2                                               | 5                   | w                                               | vc                                                            | 0,24 | 0,29 | 0,22 | 0,72 |
| <i>Pinus pinaster</i> Aiton                                           | Pinaceae         | Pinu          | 1  | Leaves, wood               | Ludic                               | 1                           | 2                                               | 2                   | w                                               | mc                                                            | 0,06 | 0,12 | 0,30 | 1,00 |

| Species                                 | Botanical family | Folk names              | FC | Used parts                       | Categories of use        | Number of categories of use | Number of different uses (secondary categories) | Number of citations | Wild/cultivated w: wild c: cultivated w/c: both | Local frequency r: rare mc: moderately common vc: very common | RFC  | CI   | H'   | J    |
|-----------------------------------------|------------------|-------------------------|----|----------------------------------|--------------------------|-----------------------------|-------------------------------------------------|---------------------|-------------------------------------------------|---------------------------------------------------------------|------|------|------|------|
| <i>Pistacia lentiscus</i> L.            | Anacardiaceae    | Chessa                  | 3  | Bark                             | Medicinal                | 1                           | 1                                               | 3                   | w                                               | vc                                                            | 0,18 | 0,18 | 0,00 | 0,00 |
| <i>Plantago coronopus</i> L.            | Plantaginaceae   | _                       | 1  | Leaves from basal rosette, stems | Alimentary               | 1                           | 3                                               | 3                   | w                                               | vc                                                            | 0,06 | 0,18 | 0,48 | 1,00 |
| <i>Plantago lanceolata</i> L.           | Plantaginaceae   | _                       | 1  | Leaves from basal rosette        | Medicinal                | 1                           | 1                                               | 1                   | w                                               | vc                                                            | 0,06 | 0,06 | 0,00 | 0,00 |
| <i>Prunus dulcis</i> (Miller) D.A. Webb | Rosaceae         | Mendula                 | 1  | Fruits (endocarps)               | Medicinal                | 1                           | 1                                               | 1                   | w/c                                             | mc                                                            | 0,06 | 0,06 | 0,00 | 0,00 |
| <i>Prunus spinosa</i> L.                | Rosaceae         | Prunishedda, Isprunazza | 3  | Fruits, branches                 | Agropastoral, Alimentary | 2                           | 2                                               | 3                   | w                                               | mc                                                            | 0,18 | 0,18 | 0,28 | 0,92 |
| <i>Pyrus amygdaliformis</i> Vill.       | Rosaceae         | Pirastru                | 1  | Fruits                           | Alimentary               | 1                           | 1                                               | 1                   | w                                               | mc                                                            | 0,06 | 0,06 | 0,00 | 0,00 |
| <i>Quercus pubescens</i> Willd.         | Fagaceae         | Chercu                  | 2  | Galls                            | Ludic                    | 1                           | 2                                               | 3                   | w                                               | mc                                                            | 0,12 | 0,18 | 0,28 | 0,92 |
| <i>Ranunculus bulbosus</i> L.           | Ranunculaceae    | Ranunculu               | 1  | Leaves                           | Medicinal                | 1                           | 1                                               | 1                   | w                                               | r                                                             | 0,06 | 0,06 | 0,00 | 0,00 |
| <i>Raphanus raphanistrum</i> L.         | Cruciferae       | Ermulatta               | 3  | Leaves from basal rosette        | Alimentary               | 1                           | 1                                               | 3                   | w                                               | vc                                                            | 0,18 | 0,18 | 0,00 | 0,00 |
| <i>Reichardia picroides</i> (L.) Roth   | Compositae       | Mammalucca              | 1  | Leaves from basal rosette        | Alimentary               | 1                           | 2                                               | 2                   | w                                               | mc                                                            | 0,06 | 0,12 | 0,30 | 1,00 |
| <i>Rubus ulmifolius</i> Schott          | Rosaceae         | Rubu                    | 4  | Leaves, fruits                   | Alimentary, Medicinal    | 2                           | 6                                               | 10                  | w                                               | vc                                                            | 0,24 | 0,59 | 0,76 | 0,98 |
| <i>Rumex thyrsoides</i> Desf.           | Polygonaceae     | Miliacra                | 3  | Leaves                           | Alimentary               | 1                           | 2                                               | 3                   | w                                               | vc                                                            | 0,18 | 0,18 | 0,28 | 0,92 |
| <i>Sambucus nigra</i> L.                | Caprifoliaceae   | Sabucu                  | 1  | Flowers                          | Medicinal                | 1                           | 1                                               | 1                   | w                                               | mc                                                            | 0,06 | 0,06 | 0,00 | 0,00 |
| <i>Sanguisorba minor</i> Scop.          | Rosaceae         | _                       | 1  | Leaves                           | Medicinal                | 1                           | 1                                               | 1                   | w                                               | r                                                             | 0,06 | 0,06 | 0,00 | 0,00 |
| <i>Scandix pecten-veneris</i> L.        | Umbelliferae     | Orolozeddos             | 1  | Fruits                           | Ludic                    | 1                           | 1                                               | 1                   | w                                               | vc                                                            | 0,06 | 0,06 | 0,00 | 0,00 |
| <i>Scolymus hispanicus</i> L.           | Compositae       | Gardu                   | 1  | Stems                            | Alimentary               | 1                           | 1                                               | 1                   | w                                               | vc                                                            | 0,06 | 0,06 | 0,00 | 0,00 |

| Species                                   | Botanical family | Folk names                   | FC | Used parts                | Categories of use                     | Number of categories of use | Number of different uses (secondary categories) | Number of citations | Wild/ cultivated w: wild c: cultivated w/c: both | Local frequency r: rare mc: moderately common vc: very common | RFC  | CI   | H'   | J    |
|-------------------------------------------|------------------|------------------------------|----|---------------------------|---------------------------------------|-----------------------------|-------------------------------------------------|---------------------|--------------------------------------------------|---------------------------------------------------------------|------|------|------|------|
| <i>Sedum caeruleum</i> L.                 | Crassulaceae     | Achinedda e monte            | 1  | Leaves                    | Alimentary                            | 1                           | 1                                               | 1                   | w                                                | vc                                                            | 0,06 | 0,06 | 0,00 | 0,00 |
| <i>Silybum marianum</i> (L.) Gaertner     | Compositae       | Gardu                        | 1  | Stems                     | Alimentary                            | 1                           | 1                                               | 1                   | w                                                | vc                                                            | 0,06 | 0,06 | 0,00 | 0,00 |
| <i>Sinapis arvensis</i> L.                | Cruciferae       | Ermulata                     | 1  | Leaves from basal rosette | Alimentary                            | 1                           | 1                                               | 1                   | w                                                | mc                                                            | 0,06 | 0,06 | 0,00 | 0,00 |
| <i>Sisymbrium officinale</i> (L.) Scop.   | Cruciferae       | Ermulata                     | 1  | Leaves from basal rosette | Alimentary                            | 1                           | 1                                               | 1                   | w                                                | mc                                                            | 0,06 | 0,06 | 0,00 | 0,00 |
| <i>Smilax aspera</i> L.                   | Liliaceae        | Teti                         | 1  | Fruits                    | Domestic                              | 1                           | 1                                               | 1                   | w                                                | mc                                                            | 0,06 | 0,06 | 0,00 | 0,00 |
| <i>Smyrnium rotundifolium</i> Miller      | Umbelliferae     | Brentedda                    | 1  | Stems                     | Alimentary                            | 1                           | 1                                               | 1                   | w                                                | vc                                                            | 0,06 | 0,06 | 0,00 | 0,00 |
| <i>Sonchus tenerrimus</i> L.              | Compositae       | Gardu minzone, zicoria burda | 2  | Leaves from basal rosette | Alimentary                            | 1                           | 3                                               | 5                   | w                                                | vc                                                            | 0,12 | 0,29 | 0,46 | 0,96 |
| <i>Taraxacum officinale</i> Weber (s. l.) | Compositae       | Zicoria burda                | 1  | Leaves from basal rosette | Alimentary, Medicinal                 | 2                           | 4                                               | 4                   | w                                                | vc                                                            | 0,06 | 0,24 | 0,45 | 0,75 |
| <i>Telina monspessulana</i> (L.) Koch     | Leguminosae      | Matricusa                    | 2  | Branches/ twigs           | Domestic                              | 1                           | 2                                               | 3                   | w                                                | mc                                                            | 0,12 | 0,18 | 0,28 | 0,92 |
| <i>Triticum durum</i> Desf.               | Graminaceae      | Tridicu                      | 2  | Live plants (etiolated)   | Magic/ritual/ propitiatory, Religious | 2                           | 2                                               | 3                   | c                                                | mc                                                            | 0,12 | 0,18 | 0,28 | 0,92 |
| <i>Umbilicus horizontalis</i> (Guss.) DC. | Crassulaceae     | Caliche e muru               | 2  | Leaves                    | Ludic, Medicinal                      | 2                           | 3                                               | 3                   | w                                                | vc                                                            | 0,12 | 0,18 | 0,48 | 1,00 |
| <i>Urtica dioica</i> L.                   | Urticaceae       | Pistiddori                   | 1  | Leaves                    | Medicinal                             | 1                           | 1                                               | 1                   | w                                                | vc                                                            | 0,06 | 0,06 | 0,00 | 0,00 |
| <i>Urtica membranacea</i> L.              | Urticaceae       | Pistiddori                   | 1  | Epigeal part (as a whole) | Domestic, Medicinal                   | 2                           | 2                                               | 2                   | w                                                | vc                                                            | 0,06 | 0,12 | 0,00 | 0,00 |
| <i>Urtica urens</i> L.                    | Urticaceae       | Pistiddori                   | 1  | Epigeal part (as a whole) | Domestic                              | 1                           | 1                                               | 1                   | w                                                | vc                                                            | 0,06 | 0,06 | 0,00 | 0,00 |

| Species                                             | Botanical family | Folk names  | FC | Used parts                | Categories of use         | Number of categories of use | Number of different uses (secondary categories) | Number of citations | Wild/cultivated w: wild c: cultivated w/c: both | Local frequency r: rare mc: moderately common vc: very common | RFC  | CI   | H'   | J    |
|-----------------------------------------------------|------------------|-------------|----|---------------------------|---------------------------|-----------------------------|-------------------------------------------------|---------------------|-------------------------------------------------|---------------------------------------------------------------|------|------|------|------|
| <i>Verbascum pulverulentum</i> Vill.                | Scrophulariaceae | Trovodda    | 1  | Live plants               | Magic/ritual/propitiatory | 1                           | 1                                               | 1                   | w                                               | vc                                                            | 0,06 | 0,06 | 0,00 | 0,00 |
| <i>Vicia villosa</i> Roth                           | Leguminosae      | Pane e casu | 2  | Flowers                   | Alimentary                | 1                           | 1                                               | 2                   | w                                               | vc                                                            | 0,12 | 0,12 | 0,00 | 0,00 |
| <i>Vinca difformis</i> Pourret                      | Apocynaceae      | Pruinca     | 2  | Epigeal part (as a whole) | Religious                 | 1                           | 1                                               | 2                   | w                                               | mc                                                            | 0,12 | 0,12 | 0,00 | 0,00 |
| <i>Vinca major</i> L. var. <i>variegata</i> Pourret | Apocynaceae      | Pruinca     | 2  | Epigeal part (as a whole) | Religious                 | 1                           | 1                                               | 2                   | c                                               | mc                                                            | 0,12 | 0,12 | 0,00 | 0,00 |
